# Supplementary material for: Double-mode detection of HClO by naked eye and concurrent fluorescence increasing in absolute PBS
Source: Royal Society of Chemistry journal article supplement (doi:10.1039/c6ra03959f), 2016-01-01
Supplement: c6ra03959f1.pdf [file c6ra03959f1.pdf]

## Supporting Information

### Double-mode detection of HClO by naked eye and concurrent fluorescence increasing in absolute PBS

Beng Wang,<sup>‡a</sup> Jia Wen,<sup>‡a</sup> Kuo Gao,<sup>‡b</sup> Hui Yan,<sup>a</sup> Yongqian Xu,<sup>a</sup> Hongjuan Li,<sup>a</sup>  
Jianxin Chen,<sup>\*b</sup> Wei Wang<sup>\*b</sup> and Shiguo Sun<sup>\*a</sup>

<sup>a</sup> College of Science, Northwest A&F University, Yangling, Shaanxi, 712100, China.

<sup>b</sup> Beijing University of Chinese Medicine, No.11 Beisanhuandonglu, Chaoyang District, Beijing, 100029, China.

<sup>‡</sup> These authors contributed equally.

#### Table of contents

1. Materials and apparatus
2. Synthetic procedures of **WCN**
3. Water solubility of **WCN**
4. Absorption properties of **WCN**
5. Dynamics of **WCN** to HClO
6. Absorption responses to HClO
7. Fluorescence response to HClO and other analytes
8. The effect of pH for **WCN**
9. Comparison about the detection limits for HClO
10. The effect of solution on probe **WCN**
11. Cell toxicity test of **WCN**
11. Characterizations

## Materials and apparatus

All solvents and chemical reagents were analytical grade and purchased from commercial suppliers.  $^1\text{H}$  NMR spectra were recorded on a Bruker 500 MHz AVANCE III spectrometer with chemical shifts reported in ppm at room temperature. Mass spectra were obtained with Thermo Fisher LCQ Fleet mass spectrometer (USA) and a LC/Q-ToF MS spectrometry (USA). Absorption spectra were collected by using a Shimadzu 1750 UV-visible spectrometer (Japan). Fluorescence spectra were measured with a Shimadzu RF-5301 fluorescence spectrometer (Japan). The pH of the testing systems was determined by a PHS-3C pH Meter (China). Cell toxicity test of WCN was tested by microplate reader (KHB ST-360). The confocal laser microscope data were acquired using a confocal fluorescence microscope (OLYMPUS FV-1000). The mouse imaging was conducted by a vivo imaging system FX Pro (Kodak In-Vivo imaging system FX Pro, USA).

All of the experiments were performed in compliance with the relevant laws and institutional guidelines, and were approved by Northwest A&F University.

## Synthetic procedures of probe WCN

Acenaphthene-1,2-dione (1.82 g, 1 equiv, 10 mmol) and malononitrile (1.32 g, 2equiv, 20 mmol) were dissolved in absolute ethyl alcohol (60 mL). The solution was refluxed for 3 h under strong magnetic stirring. Note that the yellow mixture slowly took into a deep green color upon heating. After cooling at 0 °C, filtration of the reaction mixture yielded a green dark powder. Purification of the crude over silica gel column chromatography afforded a dark blue powder. The polarity of the starting eluent (dichloromethane / ethyl acetate = 30:70) was slowly increased up to 100% ethyl acetate.  $^1\text{H}$  NMR (500 MHz, DMSO):  $\delta$  9.19 (d,  $J = 8.0$  Hz,  $^1\text{H}$ ), 8.49 (d,  $J = 7.5$  Hz,  $^1\text{H}$ ), 7.74 (t,  $J = 7.9$  Hz,  $^1\text{H}$ ), 7.59 (d,  $J = 9.1$  Hz,  $^1\text{H}$ ), 7.10 (d,  $J = 9.1$  Hz,  $^1\text{H}$ ). ESI-MS ( $\text{C}_{18}\text{H}_6\text{N}_4\text{O}$ ),  $[\text{M}-\text{H}]^-$ , calc.  $m/z = 293.05$ , found  $m/z = 293.17$ .

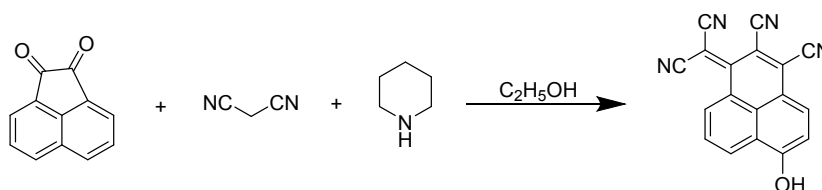

## Water solubility of WCN

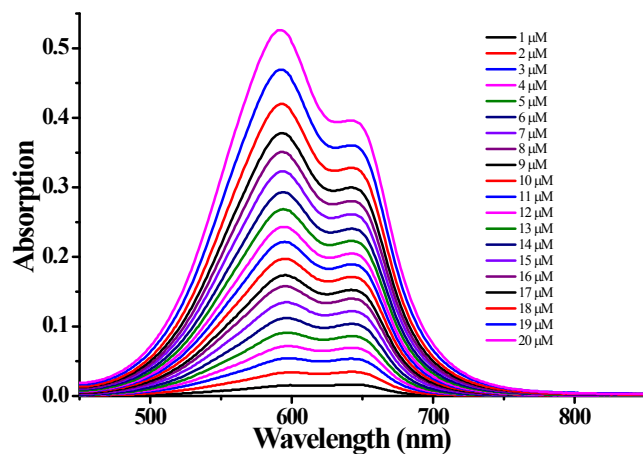

Fig. S1 The absorbance of various concentrations of WCN in PBS (20 mM, pH=7.4).

## Absorption properties of WCN

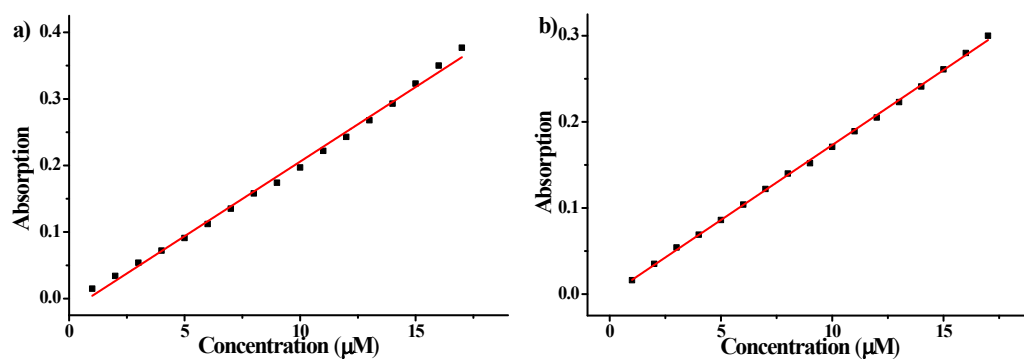

Fig. S2 (a) The linear relationship between the absorption at 595 nm and WCN concentrations. (b) The linear relationship between the absorption at 645 nm and WCN concentrations.

## Dynamics of WCN to HClO

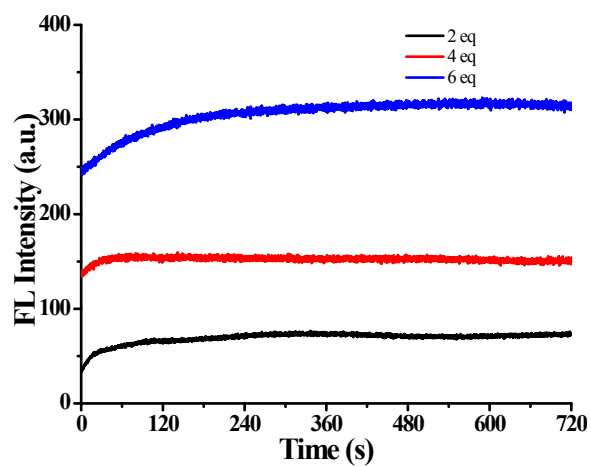

**Fig. S3** Time-dependent fluorescence intensity changes of WCN (5 μM) at 560 nm upon addition of varied concentrations of HClO. All data were recorded in PBS buffer (20 mM, pH 7.4) at room temperature.  $\lambda_{\text{ex}} = 530$  nm.

## Absorption response to HClO

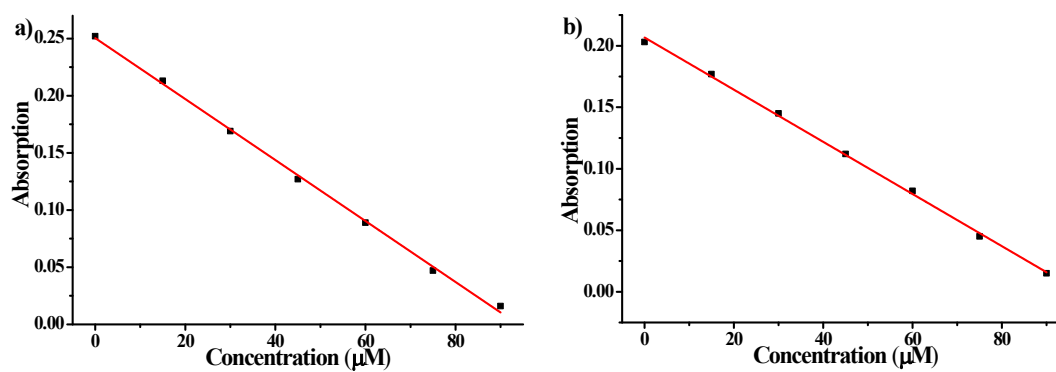

**Fig. S4** (a) The linear relationship between the absorption of WCN at 595 nm and HClO concentrations. (b) The linear relationship between the absorption of WCN at 645 nm and HClO concentrations.

## Fluorescence response to HClO and other analytes

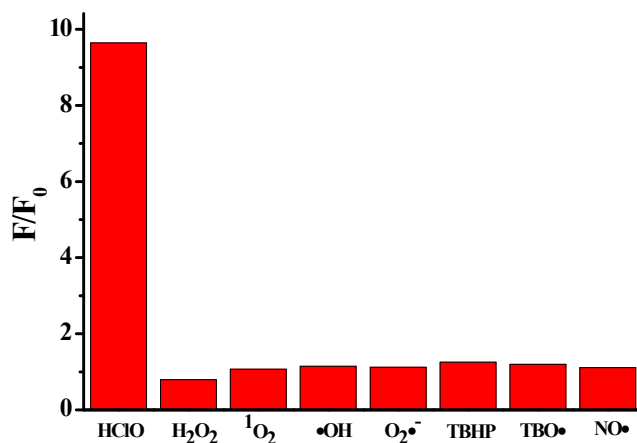

**Fig. S5** Fluorescence ratio ( $F/F_0$ ) at 560 nm of WCN (5  $\mu$ M) with HClO (10  $\mu$ M) in the presence of various ROS/RNS (100  $\mu$ M) in PBS buffer (20 mM, pH 7.4) at room temperature.  $\lambda_{ex} = 530$  nm.

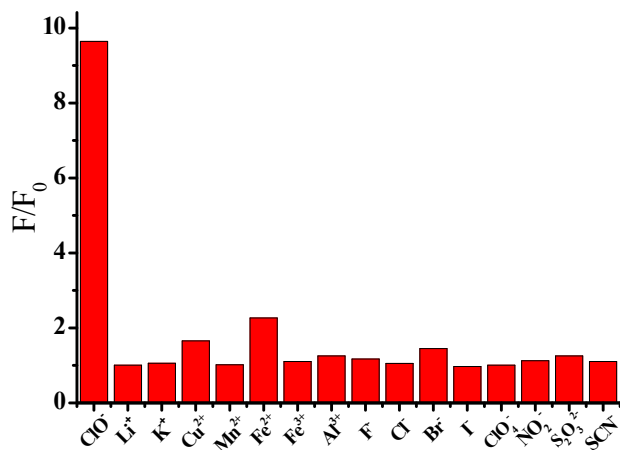

**Fig. S6** Fluorescence spectra of WCN (5  $\mu$ M) upon the addition of ClO<sup>-</sup> (10  $\mu$ M) and other analytes (100  $\mu$ M for each) respectively in PBS buffer (20 mM, pH 7.4) at room temperature. All data were collected 5 min after the addition of the above analytes.  $\lambda_{ex} = 530$  nm,  $\lambda_{em} = 560$  nm.

## The effect of pH for WCN

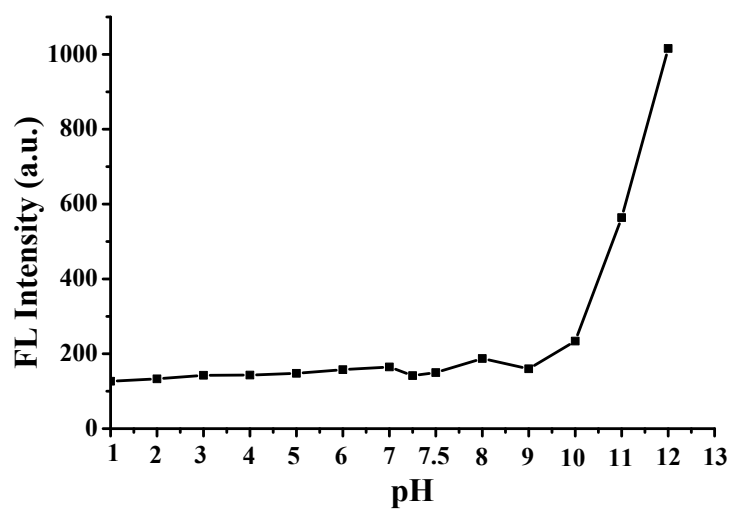

Fig. S7 The effect of pH value on the fluorescence intensity of WCN (10  $\mu$ M).

## The effect of solution on probe WCN

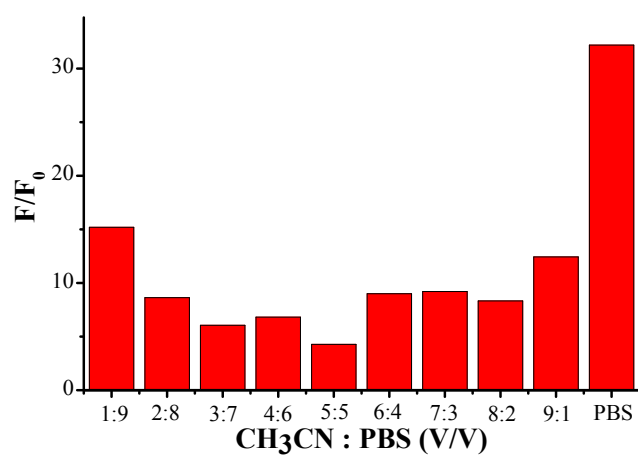

Fig. S8 Fluorescence intensity of WCN (5  $\mu$ M) in different ratio of PBS (20 mM, pH = 7.4) and CH<sub>3</sub>CN with the addition of HClO (25  $\mu$ M) at room temperature.  $\lambda_{\text{ex}}$  = 530 nm,  $\lambda_{\text{em}}$  = 560 nm.

## Cell toxicity test of WCN

Briefly, HeLa cells were seeded in 96-well microplates at a density of  $1 \times 10^5$  cells/mL in 100  $\mu$ L medium containing 10% FBS. After 24 h of cell attachment, plates were washed with 100  $\mu$ L/well phosphate buffered saline (PBS) and then cells were cultured in medium with various concentrations (2.5-20  $\mu$ M) of WCN for 24 h. 10  $\mu$ L of MTT (5 mg/mL) prepared in PBS was added to each well and the plates were incubated at 37  $^{\circ}$ C for 4 h in a 5% CO<sub>2</sub> humidified incubator. The medium was then carefully removed, and the purple products were lysed in 200  $\mu$ L dimethyl sulfoxide (DMSO). The plate was shaken for 10 min and the absorbance was measured at 492 nm using a microplate reader (KHB ST-360).

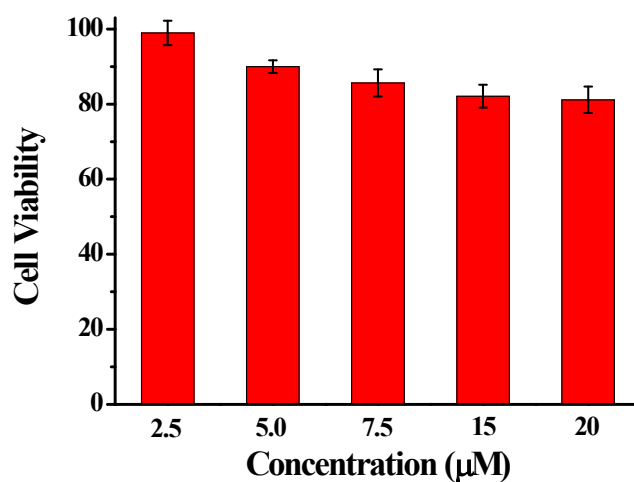

**Fig. S9** Cell viability of HeLa cells in the presence of different concentrations of WCN after 24 h of incubation determined by the MTT assay. Error bars stand for the mean value of five experiments.

## Comparison about the detection limits for HClO

**Table S1** Comparison table about the detection limits for HClO

| Probe     | Linear range  | Solvent                       | LOD (M)               |
|-----------|---------------|-------------------------------|-----------------------|
| Ref. 6f   | 0–10 nM       | PBS-EtOH, 9:1                 | $5.6 \times 10^{-10}$ |
| Ref. 6g   | 0–80 $\mu$ M  | PBS-0.05% DMSO                | $1.79 \times 10^{-8}$ |
| Ref. 7e   | 2–20 $\mu$ M  | PBS                           | $3 \times 10^{-7}$    |
| Ref. 7f   | 0–0.5 $\mu$ M | PBS-CH <sub>3</sub> CN, 1:9   | $9.3 \times 10^{-8}$  |
| Ref. 7g   | 0–100 $\mu$ M | CH <sub>3</sub> CN-Water, 4:1 | $2.8 \times 10^{-8}$  |
| Ref. 7h   | 0–10 $\mu$ M  | PBS-0.5% DMSO                 | $4.3 \times 10^{-7}$  |
| This work | 0–60 $\mu$ M  | PBS                           | $7.7 \times 10^{-11}$ |

## Characterization

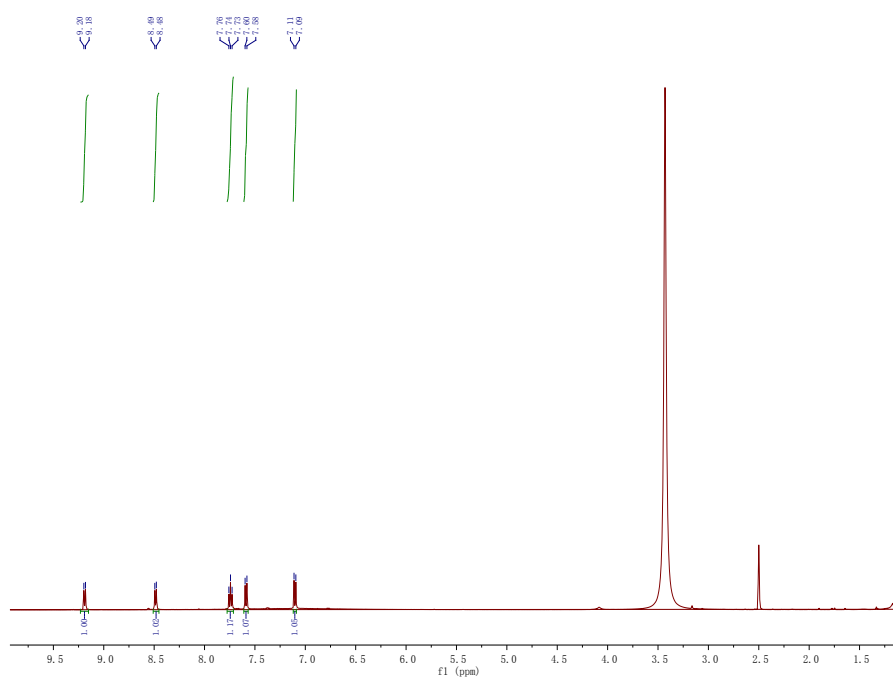

**Fig. S10** <sup>1</sup>H NMR of WCN in DMSO-*d*<sub>6</sub>.



[SSG]-wbzp-1 #29-33 RT: 0.22-0.28 AV: 5 NL: 1.30E3  
T: ITMS - c ESI Full ms [50.00-2000.00]

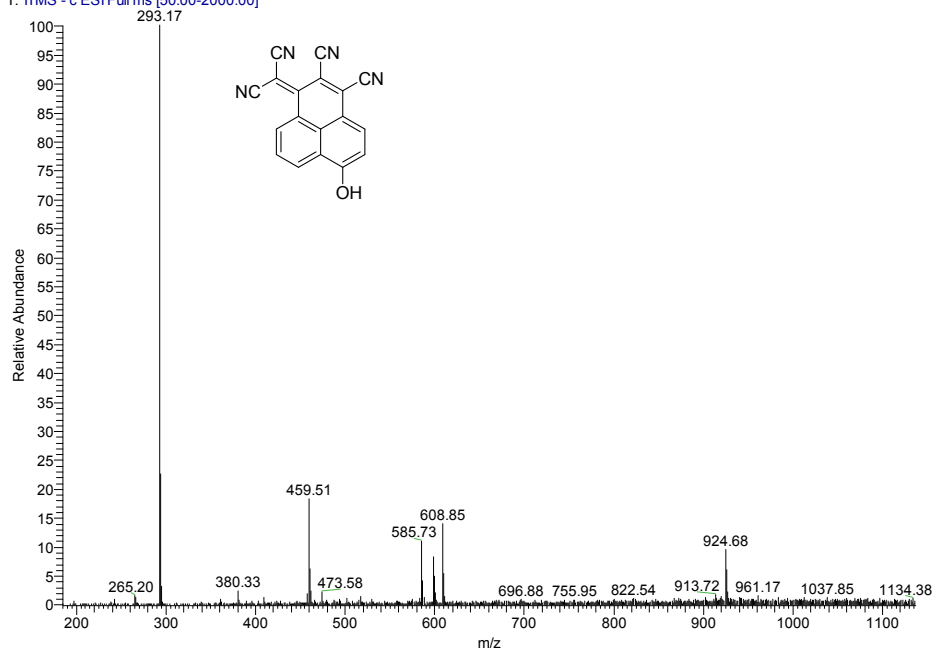

Fig. S11 ESI-MS of WCN

[SSG]-9292 #24-27 RT: 0.18-0.23 AV: 4 NL: 1.41E2  
T: ITMS - c ESI sid=35.00 Full ms [50.00-2000.00]

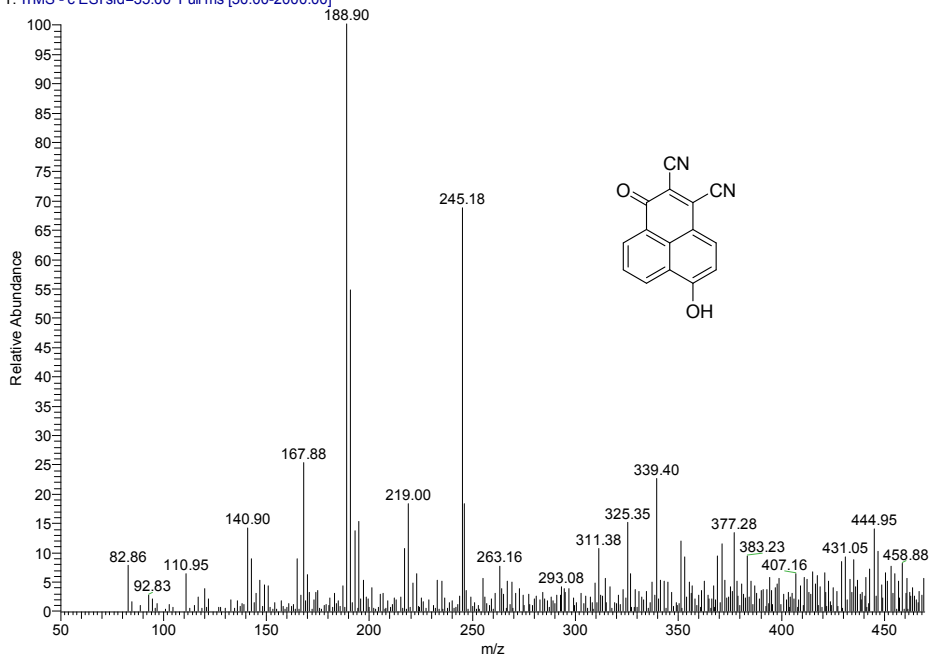

Fig. S12 ESI-MS spectra of WCN + HClO.
